# Supplementary material for: Congenital Nonprofound Bilateral Sensorineural Hearing Loss in Children: Comprehensive Characterization of Auditory Function and Hearing Aid Benefit
Source: MDPI journal article supplement (doi:10.3390/audiolres12050054), 2022-10-07
Supplement: s1 [file s1]

**Table S1.** Mean (SD, range) and median pure-tone thresholds (dB HL) for left, right, better, and worse ear, respectively (n=11, except at 6000 and 8000 Hz. \* denotes n=10))

|           |        | Pure-tone threshold (dB HL) |           |            |           |
|-----------|--------|-----------------------------|-----------|------------|-----------|
| Frequency |        | Left ear                    | Right ear | Better ear | Worse ear |
| 125 Hz    | Mean   | 25.0                        | 24.8      | 24.1       | 25.7      |
|           | SD     | 15.6                        | 19.2      | 19.0       | 15.8      |
|           | Median | 17.4                        | 20.9      | 22.4       | 17.4      |
|           | Min    | 9.0                         | 6.6       | 6.6        | 9.0       |
|           | Max    | 53.4                        | 71.5      | 71.5       | 53.4      |
| 250 Hz    | Mean   | 26.8                        | 24.7      | 24.4       | 27.0      |
|           | SD     | 17.5                        | 15.7      | 14.7       | 18.3      |
|           | Median | 19.2                        | 21.8      | 21.8       | 19.2      |
|           | Min    | 8.6                         | 9.9       | 10.0       | 8.6       |
|           | Max    | 70.1                        | 57.6      | 57.6       | 70.1      |
| 500 Hz    | Mean   | 33.8                        | 31.6      | 31.0       | 34.4      |
|           | SD     | 20.4                        | 21.3      | 19.9       | 21.6      |
|           | Median | 28.9                        | 24.6      | 24.6       | 28.9      |
|           | Min    | 10.7                        | 8.1       | 10.7       | 8.1       |
|           | Max    | 80.6                        | 81.4      | 81.4       | 80.6      |
| 1000 Hz   | Mean   | 43.5                        | 39.3      | 38.3       | 44.4      |
|           | SD     | 17.0                        | 16.1      | 16.1       | 16.7      |
|           | Median | 42.7                        | 34.9      | 34.9       | 42.7      |

|         |        |        |       |       |        |
|---------|--------|--------|-------|-------|--------|
| 1500 Hz | Min    | 20.4   | 16.5  | 16.5  | 24.0   |
|         | Max    | 83.5   | 72.3  | 72.3  | 83.5   |
|         | Mean   | 50.6   | 42.3  | 47.2  | 45.7   |
|         | SD     | 24.2   | 19.1  | 24.8  | 19.4   |
|         | Median | 47.5   | 43.8  | 47.5  | 43.8   |
|         | Min    | 20.6   | 15.5  | 15.5  | 20.6   |
| 2000 Hz | Max    | 93.2   | 78.2  | 93.2  | 80.7   |
|         | Mean   | 53.5   | 49.3  | 50.0  | 52.8   |
|         | SD     | 19.7   | 17.8  | 18.4  | 19.3   |
|         | Median | 56.1   | 48.1  | 46.3  | 54.5   |
|         | Min    | 25.4   | 19.8  | 19.8  | 25.4   |
|         | Max    | 85.2   | 73.3  | 73.3  | 85.2   |
| 3000 Hz | Mean   | 54.4   | 49.4  | 49.2  | 54.6   |
|         | SD     | 20.8   | 17.6  | 17.8  | 20.5   |
|         | Median | 55.2   | 49.2  | 46.9  | 54.5   |
|         | Min    | 23.9   | 19.3  | 19.3  | 23.9   |
|         | Max    | 101.1  | 79.8  | 79.8  | 101.1  |
| 4000 Hz | Mean   | 54.2   | 52.8  | 52.2  | 54.8   |
|         | SD     | 21.3   | 25.5  | 25.5  | 21.2   |
|         | Median | 54.5   | 52.3  | 48.0  | 53.7   |
|         | Min    | 13.4   | 7.0   | 7.0   | 13.4   |
|         | Max    | 99.1   | 106.5 | 106.5 | 99.1   |
| 6000 Hz | Mean   | 56.0 * | 59.9  | 60.9  | 55.0 * |
|         | SD     | 19.8   | 20.8  | 21.0  | 19.3   |

|         |        |        |        |        |        |
|---------|--------|--------|--------|--------|--------|
| 8000 Hz | Median | 58.3   | 58.7   | 60.0   | 58.3   |
|         | Min    | 12.1   | 22.6   | 22.6   | 12.1   |
|         | Max    | 81.0   | 95.6   | 95.6   | 79.0   |
|         | Mean   | 53.4 * | 55.6 * | 52.4 * | 56.6 * |
|         | SD     | 20.2   | 22.2   | 20.7   | 21.6   |
|         | Median | 60.1   | 58.7   | 58.7   | 60.1   |
|         | Min    | 15.4   | 9.7    | 9.7    | 15.4   |
|         | Max    | 78.5   | 84.4   | 78.5   | 84.4   |
|         |        |        |        |        |        |
|         |        |        |        |        |        |

---
